# Supplementary material for: Genome-wide analyses of human noroviruses provide insights on evolutionary dynamics and evidence of coexisting viral populations evolving under recombination constraints
Source: PLoS Pathog. 2021 Jul 13;17(7):e1009744. doi: 10.1371/journal.ppat.1009744 (PMC8318288; doi:10.1371/journal.ppat.1009744)
Supplement: S1 Table — (XLSX) [file ppat.1009744.s013.xlsx]

## Sheet: Sheet1
	S1 Table: Archival samples sequenced in this study
	No	Strain	Polymerase type	Genotype	Country	Year	Accession number
	1	Arg1261	GII.P7	GII.6	Argentina	1998	MW305599
	2	Arg1382	GII.P26	GII.12	Argentina	1998	MK733201
	3	Arg4220	GII.P21	GII.2	Argentina	2004	MW305600
	4	Arg4231	GII.P21	GII.2	Argentina	2004	MW305601
	5	Arg4237	GII.P7	GII.7	Argentina	2004	MW305602
	6	Arg4238	GII.P7	GII.7	Argentina	2004	MW305603
	7	Arg4372	GI.P3	GI.3	Argentina	2004	MW305494
	8	Arg4379	GII.P7	GII.7	Argentina	2004	MW305605
	9	Arg4416	GII.P7	GII.7	Argentina	2004	MW305606
	10	Arg4446	GII.P31	GII.17	Argentina	2005	MW305607
	11	Arg4450	GI.P3	GI.3	Argentina	2005	MW305495
	12	Arg4452	GII.P21	GII.3	Argentina	2005	MW305608
	13	Arg4521	GII.P13	GII.17	Argentina	2005	MW305609
	14	Arg4522	GII.P13	GII.17	Argentina	2005	MW305610
	15	Arg5448	GII.P7	GII.6	Argentina	2008	MW305611
	16	Arg10030	GI.P5	GI.5	Argentina	2012	MW305496
	17	Arg10508	GII.P7	GII.6	Argentina	2012	MW305613
	18	Arg10515	GII.P7	GII.6	Argentina	2012	MW305614
	19	Arg10907	GII.P31	GII.4	Argentina	2012	MW305617
	20	Arg9847	GII.P2	GII.2	Argentina	2012	MW305612
	21	Arg10893	GII.P7	GII.6	Argentina	2013	MW305615
	22	Arg10896	GII.P7	GII.6	Argentina	2013	MW305616
	23	Arg11083	GI.P11	GI.6	Argentina	2013	MW305497
	24	Arg11085	GI.P11	GI.6	Argentina	2013	MW305498
	25	Arg11927*		GII.6	Argentina	2014	MW305740
	26	Arg11943	GII.P7	GII.6	Argentina	2014	MW305618
	27	Arg12540	GII.P7	GII.6	Argentina	2014	MW305619
	28	Arg12771	GII.P7	GII.7	Argentina	2014	MW305620
	29	Arg12774	GII.P31	GII.4	Argentina	2014	MW305621
	30	Arg12827	GII.P33	GII.1	Argentina	2014	MW305622
	31	Arg12866	GII.P31	GII.4	Argentina	2014	MW305623
	32	Arg12908	GII.P31	GII.4	Argentina	2014	MW305624
	33	Arg13435	GII.P31	GII.4	Argentina	2014	MW305626
	34	Arg13099	Could not be assigned	GII.17	Argentina	2015	MW305625
	35	Arg13668	GI.P4	GI.4	Argentina	2015	MW305499
	36	Arg13737	GII.P2	GII.2	Argentina	2015	MW305627
	37	Arg13802	GII.P33	GII.1	Argentina	2015	MW305628
	38	Arg13808	GII.P33	GII.1	Argentina	2015	MW305629
	39	Arg14071	GII.P33	GII.1	Argentina	2015	MW305630
	40	Arg14085	GII.P21	GII.3	Argentina	2015	MW305631
	41	Arg14249	GII.P16	GII.4	Argentina	2015	MW305632
	42	Arg14493	GII.P16	GII.4	Argentina	2016	MW305633
	43	Arg14617	GII.P16	GII.4	Argentina	2016	MW305634
	44	Arg14665	GI.P3	GI.3	Argentina	2016	MW305500
	45	Arg14711	GII.P7	GII.6	Argentina	2016	MW305635
	46	Arg14735	GII.P16	GII.4	Argentina	2016	MW305636
	47	Arg14741	GII.P16	GII.4	Argentina	2016	MW305637
	48	Arg14757	GII.P7	GII.6	Argentina	2016	MW305638
	49	Arg14774	GII.P16	GII.4	Argentina	2016	MW305639
	50	Arg14811	GII.P2	GII.2	Argentina	2016	MW305640
	51	Arg14813	GII.P2	GII.2	Argentina	2016	MW305641
	52	Arg15441	GII.P16	GII.2	Argentina	2017	MW305642
	53	Arg15465	GII.PNA9	GII.27	Argentina	2017	MK733202
	54	Arg15468	GII.P16	GII.2	Argentina	2017	MW305643
	55	Arg15482	GII.PNA9	GII.27	Argentina	2017	MK733203
	56	Arg15559	GII.PNA9	GII.27	Argentina	2017	MK733204
	57	Arg15733	GII.P16	GII.2	Argentina	2017	MW305644
	58	Arg15734	GII.P16	GII.2	Argentina	2017	MW305645
	59	Arg15735	GII.P16	GII.2	Argentina	2017	MW305646
	60	Arg15813	GII.PNA9	GII.27	Argentina	2017	MK733205
	61	Arg15983	GII.P16	GII.4	Argentina	2017	MW305647
	62	Arg16008	GII.P7	GII.14	Argentina	2017	MW305648
	63	Arg16075	GII.P16	GII.2	Argentina	2018	MW305649
	64	B17-c1	GII.P7	GII.14	Central African Republic	1976	MW305569
	65	B17-c2	GII.P35	GII.2	Central African Republic	1976	MW305570
	66	B8	Could not be assigned	GI.3	Central African Republic	1976	MW305491
	67	C110	GII.P39	GII.4	French Guiana	1978	MW305572
	68	C127	GII.P39	GII.4	French Guiana	1978	MW305696
	69	C140	GII.P39	GII.4	French Guiana	1978	MW305697
	70	C15	GII.P22	GII.5	French Guiana	1978	MW305580
	71	C22	GII.P22	GII.5	French Guiana	1978	MW305695
	72	C9	GI.P13	GI.3	French Guiana	1978	MW305492
	73	C91	GI.P13	GI.3	French Guiana	1978	MW305493
	74	HK4	GII.P36	GII.7	Hong Kong	1976	MW305573
	75	HK28	GII.P6	GII.6	Hong Kong	1977	MW305739
	76	HK46	GII.P41	GII.3	Hong Kong	1977	MW305574
	77	HK54	GII.P41	GII.3	Hong Kong	1977	MW305575
	78	HK74	GII.P7	GII.14	Hong Kong	1978	MW305576
	79	40	GII.P4	GII.4	Japan	1995	MW305585
	80	57	GII.P4	GII.4	Japan	1995	MW305586
	81	60	GII.P4	GII.4	Japan	1995	MW305587
	82	65	GII.P4	GII.4	Japan	1995	MW305588
	83	75	GII.P4	GII.4	Japan	1995	MW305589
	84	83*		GII.6	Japan	1995	MW305741
	85	170	GII.P4	GII.4	Japan	1995	MW305590
	86	282	GII.P4	GII.4	Japan	1995	MW305651
	87	288	GII.P4	GII.4	Japan	1995	MW305652
	88	291	GII.P4	GII.4	Japan	1995	MW305653
	89	212	GII.P6	GII.6	Japan	1996	MW305598
	90	937	GII.P4	GII.4	Japan	1996	MW305655
	91	946	GII.P4	GII.4	Japan	1997	MW305656
	92	953	GII.P34	GII.2	Japan	1997	MW305657
	93	1034	GII.P5	GII.5	Japan	1997	MW305658
	94	1115	GII.P4	GII.4	Japan	1997	MW305661
	95	1123	GII.P4	GII.4	Japan	1997	MW305662
	96	10010	GII.P7	GII.14	Japan	2010	MW305663
	97	10590	GII.P7	GII.14	Japan	2010	MW305664
	98	10600	GII.P7	GII.14	Japan	2011	MW305665
	99	10609	GII.P7	GII.14	Japan	2011	MW305666
	100	10738	GII.P7	GII.14	Japan	2012	MW305667
	101	10744	GII.P7	GII.14	Japan	2012	MW305668
	102	10745	GII.P7	GII.14	Japan	2012	MW305669
	103	10746	GII.P7	GII.14	Japan	2012	MW305670
	104	10995	GII.P7	GII.14	Japan	2012	MW305671
	105	11085	GII.P7	GII.14	Japan	2012	MW305672
	106	11086	GII.P7	GII.14	Japan	2012	MW305673
	107	11087	GII.P7	GII.14	Japan	2012	MW305674
	108	11157	GII.P7	GII.7	Japan	2012	MW305675
	109	11298	GII.P33	GII.12	Japan	2012	MW305676
	110	11389	GII.P7	GII.7	Japan	2012	MW305677
	111	11384	GI.P6	GI.6	Japan	2013	MW305501
	112	11470	GII.P16	GII.13	Japan	2013	MW305678
	113	11652	GI.P6	GI.6	Japan	2013	MW305502
	114	11662	GI.P6	GI.6	Japan	2013	MW305503
	115	11692	GI.P4	GI.4	Japan	2013	MW305504
	116	11694	GI.P6	GI.6	Japan	2013	MW305505
	117	11908	GII.P7	GII.14	Japan	2013	MW305683
	118	11909	GII.P7	GII.14	Japan	2013	MW305684
	119	12084	GII.P7	GII.14	Japan	2013	MW305685
	120	12092	GII.P7	GII.14	Japan	2013	MW305686
	121	12094	GII.P7	GII.14	Japan	2013	MW305687
	122	12095	GII.P7	GII.14	Japan	2013	MW305688
	123	12097	GII.P7	GII.14	Japan	2013	MW305689
	124	12115	GII.P7	GII.14	Japan	2013	MW305690
	125	12116	GII.P7	GII.14	Japan	2013	MW305691
	126	12135	GII.P7	GII.14	Japan	2013	MW305692
	127	12247	GII.P7	GII.14	Japan	2013	MW305694
	128	11632-c1	GII.P7	GII.14	Japan	2013	MW305679
	129	11632-c2	GII.P31	GII.4	Japan	2013	MW305680
	130	11704-c1	GII.P7	GII.14	Japan	2013	MW305681
	131	11704-c2	GII.P31	GII.4	Japan	2013	MW305682
	132	12146	GII.P7	GII.14	Japan	2014	MW305693
	133	KL136	GII.P30	GII.2	Malaysia	1978	MW305578
	134	KL137	GII.P30	GII.2	Malaysia	1978	MW305579
	135	KL90	GII.P41	GII.13	Malaysia	1978	MW305577
	136	412SR	GII.P13	GII.17	Paraguay	2004	MW305654
	137	522SR	GII.P7	GII.6	Paraguay	2004	MW305564
	138	735SR	GII.P4	GII.4	Paraguay	2004	MW305565
	139	1047SR	GII.P31	GII.17	Paraguay	2005	MW305659
	140	1109SR	GII.P13	GII.17	Paraguay	2005	MW305660
	141	899SR	GII.P16	GII.16	Paraguay	2005	MW305566
	142	912SR	GII.P4	GII.4	Paraguay	2005	MW305567
	143	925SR	GII.P4	GII.4	Paraguay	2005	MW305568
	144	103HBO	GII.P7	GII.6	Paraguay	2016	MW305551
	145	168HBO	GII.P7	GII.7	Paraguay	2016	MW305552
	146	170HBO	GII.P16	GII.4	Paraguay	2016	MW305553
	147	182HBO	GII.P7	GII.6	Paraguay	2016	MW305554
	148	194HBO	GII.P7	GII.6	Paraguay	2016	MW305555
	149	203HBO	GII.P7	GII.6	Paraguay	2016	MW305556
	150	211HBO	GII.P16	GII.4	Paraguay	2016	MW305557
	151	249HBO	GII.P16	GII.4	Paraguay	2016	MW305558
	152	268HBO	GII.P7	GII.6	Paraguay	2016	MW305559
	153	278HBO	GII.P16	GII.4	Paraguay	2016	MW305560
	154	291HBO	GII.P7	GII.6	Paraguay	2016	MW305561
	155	292HBO	GII.P7	GII.7	Paraguay	2016	MW305562
	156	331HBO	GII.P7	GII.6	Paraguay	2016	MW305563
	157	55HBO	GII.P16	GII.4	Paraguay	2016	MW305548
	158	92HBO	GII.P7	GII.6	Paraguay	2016	MW305549
	159	99HBO	GII.P7	GII.7	Paraguay	2016	MW305550
	160	PNV001501	GII.P7	GII.6	Peru	2007	MW305511
	161	PNV002309	GII.P7	GII.6	Peru	2007	MW305523
	162	PNV004328	GII.P4	GII.4	Peru	2008	MW305524
	163	PNV004379	GII.P4	GII.4	Peru	2008	MW305538
	164	PNV004409*		GII.17	Peru	2008	MW305742
	165	PNV004566	GII.P4	GII.4	Peru	2008	MW305543
	166	PNV005297	GII.P4	GII.4	Peru	2008	MW305515
	167	PNV005999-c1	GII.P4	GII.4	Peru	2008	MW305525
	168	PNV005999-c2	GII.PNA2	GII.NA2	Peru	2008	MW305526
	169	PNV006003	GI.P2	GI.2	Peru	2008	MW305481
	170	PNV007073	GII.P4	GII.4	Peru	2008	MW305539
	171	PNV007123	GII.P4	GII.4	Peru	2008	MW305545
	172	PNV007866	GII.P4	GII.4	Peru	2008	MW305546
	173	PNV008216	GII.P13	GII.17	Peru	2008	MW305517
	174	PNV008673	GII.P4	GII.4	Peru	2008	MW305521
	175	PNV008798	GII.P7	GII.9	Peru	2008	MW305514
	176	PNV009485	GI.P8	GI.8	Peru	2008	MW305482
	177	PNV009733	GI.P8	GI.8	Peru	2008	MW305484
	178	PNV009912	GII.P13	GII.17	Peru	2008	MW305604
	179	PNV010077	GII.P13	GII.17	Peru	2008	MW305512
	180	PNV010548	GII.P7	GII.9	Peru	2008	MW305520
	181	PNV010945	GII.P7	GII.6	Peru	2008	MW305540
	182	PNV011143	GI.P5	GI.5	Peru	2008	MW305487
	183	PNV011149	GII.P7	GII.6	Peru	2008	MW305547
	184	PNV011225	GII.P21	GII.3	Peru	2008	MW305522
	185	PNV011308	GII.P7	GII.6	Peru	2008	MW305544
	186	PNV011337	GII.P7	GII.9	Peru	2008	MW305516
	187	PNV011935	GI.P7	GI.7	Peru	2008	MW305485
	188	PNV011941	GII.P21	GII.3	Peru	2008	MW305513
	189	PNV06929	GII.PNA2	GII.NA2	Peru	2008	MG706448
	190	PNV013852	GI.P7	GI.7	Peru	2009	MW305486
	191	PNV014022	GII.P7	GII.14	Peru	2009	MW305518
	192	PNV015015	GII.P7	GII.14	Peru	2009	MW305519
	193	PNV016867	GII.P21	GII.3	Peru	2009	MW305541
	194	PNV018146	GII.P4	GII.4	Peru	2009	MW305542
	195	PNV024019	Could not be assigned	GII.27	Peru	2010	MK733206
	196	PNV027026	Could not be assigned	GII.27	Peru	2010	MK733207
	197	PNV027757	GI.P7	GI.7	Peru	2010	MW305483
	198	ONVHH0051	GII.P31	GII.4	Peru	2013	MW305535
	199	ONVHH0711	GII.P31	GII.4	Peru	2013	MW305534
	200	ONVHH0778	GII.P16	GII.3	Peru	2013	MW305536
	201	ONVHH0788	GII.P7	GII.6	Peru	2013	MW305529
	202	ONVHH0813	GII.P7	GII.6	Peru	2013	MW305532
	203	ONVHH0814	GII.P7	GII.6	Peru	2013	MW305531
	204	ONVHH0987	GII.P40	GII.5	Peru	2013	MW305533
	205	ONVHH1144	GI.P7	GI.7	Peru	2013	MW305488
	206	ONVHH1420	GII.P40	GII.5	Peru	2013	MW305537
	207	ONVHH1493	GII.P31	GII.4	Peru	2013	MW305530
	208	ONVHH2290	GII.P31	GII.4	Peru	2014	MW305527
	209	ONVHH2342	GII.P31	GII.4	Peru	2014	MW305528
	210	DS275	GI.P10	GI.3	Saudi Arabia	1990	MW305506
	211	DS284	GII.P3	GII.17	Saudi Arabia	1990	MW305734
	212	DS330	GII.P3	GII.3	Saudi Arabia	1990	MW305733
	213	DS331	GII.P3	GII.3	Saudi Arabia	1990	MW305732
	214	DS332	GII.P3	GII.3	Saudi Arabia	1990	MW305731
	215	DS335	GII.P15	GIX.1	Saudi Arabia	1990	MW261800
	216	DS338	GII.P7	GII.14	Saudi Arabia	1990	MW305730
	217	DS357	GII.P15	GIX.1	Saudi Arabia	1990	MW261799
	218	DS359	GII.P15	GIX.1	Saudi Arabia	1990	MW261798
	219	DS379	GII.P15	GIX.1	Saudi Arabia	1990	MW261797
	220	DS381	GII.P15	GIX.1	Saudi Arabia	1990	MW261796
	221	DS383	GII.P15	GIX.1	Saudi Arabia	1990	MW261795
	222	DS384	GII.P15	GIX.1	Saudi Arabia	1990	MW261794
	223	DS385	GII.P15	GIX.1	Saudi Arabia	1990	MW261793
	224	DS386	GI.P7	GI.7	Saudi Arabia	1990	MW305508
	225	DS395	GI.P10	GI.3	Saudi Arabia	1990	MW305507
	226	DS398	GII.P15	GIX.1	Saudi Arabia	1990	MW261792
	227	DS401	GII.P15	GIX.1	Saudi Arabia	1990	MW261791
	228	DS402	GII.P15	GIX.1	Saudi Arabia	1990	MW261790
	229	DS413	GII.P15	GIX.1	Saudi Arabia	1990	MW261789
	230	DS414	GII.P15	GIX.1	Saudi Arabia	1990	MW261788
	231	DS428	GII.P15	GIX.1	Saudi Arabia	1990	MW261787
	232	S7d	GII.P7	GII.6	Senegal	1976	MW305571
	233	S9d	GII.P7	GII.6	Senegal	1976	MW305581
	234	CMH-104-05	GII.P16	GII.16	Thailand	2005	MW305699
	235	CMH-145-05	GII.P12	GII.12	Thailand	2005	MW305701
	236	CMH-047-07	GII.P7	GII.14	Thailand	2007	MW305698
	237	CMH-118-07	GII.P7	GII.14	Thailand	2007	MW305700
	238	CMH-N017-10	GII.P21	GII.21	Thailand	2010	MW305706
	239	CMH-N005-11	GII.P33	GII.12	Thailand	2011	MW305702
	240	CMH-N006-11-c1	GII.P33	GII.12	Thailand	2011	MW305703
	241	CMH-N006-11-c2	GII.P7	GII.6	Thailand	2011	MW305704
	242	CMH-N016-12	GII.P33	GII.1	Thailand	2012	MW305705
	243	CMH-S155-12	GII.P16	GII.13	Thailand	2012	MW305714
	244	CMH-N093-13	GII.P7	GII.7	Thailand	2013	MW305709
	245	CMH-N105-13	GII.P7	GII.7	Thailand	2013	MW305710
	246	CMH-N117-14	GII.P21	GII.21	Thailand	2014	MW305711
	247	CMH-N025-15	GII.P7	GII.7	Thailand	2015	MW305707
	248	CMH-S015-15	GII.P21	GII.21	Thailand	2015	MW305712
	249	CMH-S040-16	GII.P7	GII.7	Thailand	2016	MW305713
	250	CMH-S238-16	GII.P16	GII.2	Thailand	2016	MW305715
	251	CMH-S251-16	GII.P16	GII.2	Thailand	2016	MW305716
	252	CMH-ST005-16	GII.P7	GII.14	Thailand	2016	MW305719
	253	CMH-ST018-16	GII.P7	GII.7	Thailand	2016	MW305721
	254	CMH-ST093-16	GII.P7	GII.14	Thailand	2016	MW305722
	255	CMH-ST001-17	GII.P16	GII.2	Thailand	2017	MW305717
	256	CMH-ST007-17	GII.P16	GII.2	Thailand	2017	MW305720
	257	CMH-N010-18	GII.P16	GII.4	Thailand	2018	MW305723
	258	CMH-N033-18	GII.P16	GII.4	Thailand	2018	MW305708
	259	CMH-ST002-18	GII.P7	GII.7	Thailand	2018	MW305718
	260	T091	Could not be assigned	GII.4	Tunisia	1976	MW305583
	261	T045	GII.P30	GII.2	Tunisia	1977	MW305584
	262	T055	GII.P13	GII.17	Tunisia	1977	MW305582
	263	HenrytonSP24	GII.P6	GII.6	United States	1972	MW305737
	264	CHDC2904	GII.PNA3	GII.4	United States	1974	MW305729
	265	CHDC2005	Could not be assigned	GII.3	United States	1975	MW305724
	266	101-2	GII.P3	GII.3	United States	1987	MW305591
	267	101-3	GII.P3	GII.3	United States	1987	MW305592
	268	101-4	GII.P3	GII.3	United States	1987	MW305650
	269	110-1	GII.P4	GII.4	United States	1987	MW305594
	270	110-11	GII.P29	GII.12	United States	1987	MW305593
	271	110-2	GII.P29	GII.12	United States	1987	MW305595
	272	110-7	GII.P29	GII.12	United States	1987	MW305596
	273	110-8	GII.P29	GII.12	United States	1987	MW305597
	274	9-2	GI.P3	GI.3	United States	1988	MW305489
	275	9-4	GI.P3	GI.3	United States	1988	MW305509
	276	9-5	GI.P3	GI.3	United States	1988	MW305490
	277	9-9	GI.P3	GI.3	United States	1988	MW305510
	278	CHDC4031	GII.P3	GII.3	United States	1988	MW305728
	279	CHDC4090	GII.P3	GII.3	United States	1988	MW305727
	280	CHDC6261	GII.P3	GII.3	United States	1990	MW305725
	281	CHDC5365	GII.P3	GII.3	United States	1991	MW305726
	282	JW2015	GII.P31	GII.4	United States	2015	MW305738
	283	Bethesda20181111	GII.P7	GII.6	United States	2018	MW305736
	284	SSM	GII.P7	GII.6	United States	2019	MW305735
	*Sequences in subgenomic region (ORF2 and ORF3) only
